# Supplementary material for: High-performance TiO2 catalyst composited with In–1,1,2,2-tetra(4-carboxylbiphenyl)ethylene for the efficient degradation of organic pollutants
Source: Royal Society of Chemistry journal article supplement (doi:10.1039/d3en00820g), 2024-01-01
Supplement: d3en00820g1.pdf [file d3en00820g1.pdf]

## Supporting information

*for*

### **High-performance TiO<sub>2</sub> catalyst composited with In-1,1,2,2-tetra(4-carboxylbiphenyl)ethylene for the efficient degradation of organic pollutants**

Xinyu Liu<sup>1,2</sup>, Chenchen Li<sup>2</sup>, Jian Nan<sup>2,3</sup>, Ruike Liang<sup>2</sup>, Huabin Wang<sup>2</sup>, Rui Xu<sup>1,2,3</sup>,  
Yong Zhang<sup>1,2\*</sup>

1 Provincial Key Laboratory of Rural Energy Engineering in Yunnan, Yunnan Normal University, Kunming 650500, China

2 School of Energy and Environment Science, Yunnan Normal University, Kunming 650500, China

3 Southwest United Graduate School, Yunnan Normal University, Kunming 650031, China

#### **Correspondence:**

yongzhang7805@126.com (Y. Zhang)

## Table of contents

Figure S1: Photocatalytic experimental reactor

Figure S2: XRD patterns of In-TCBPE, TIT-1, TIT-2, TIT-3, and TIT-4.

Figure S3: Mott–Schottky plots of (A)  $\text{TiO}_2$  and (B) In–TCBPE

Figure S4: Adsorption experiment of RhB for the catalysts in the dark

Figure S5: EPR spectra of TIT-3 for the signal of (A) TEMPO-h+, (B) DMPO- $\cdot\text{OH}$  and (C) DMPO- $\cdot\text{O}_2^-$ .

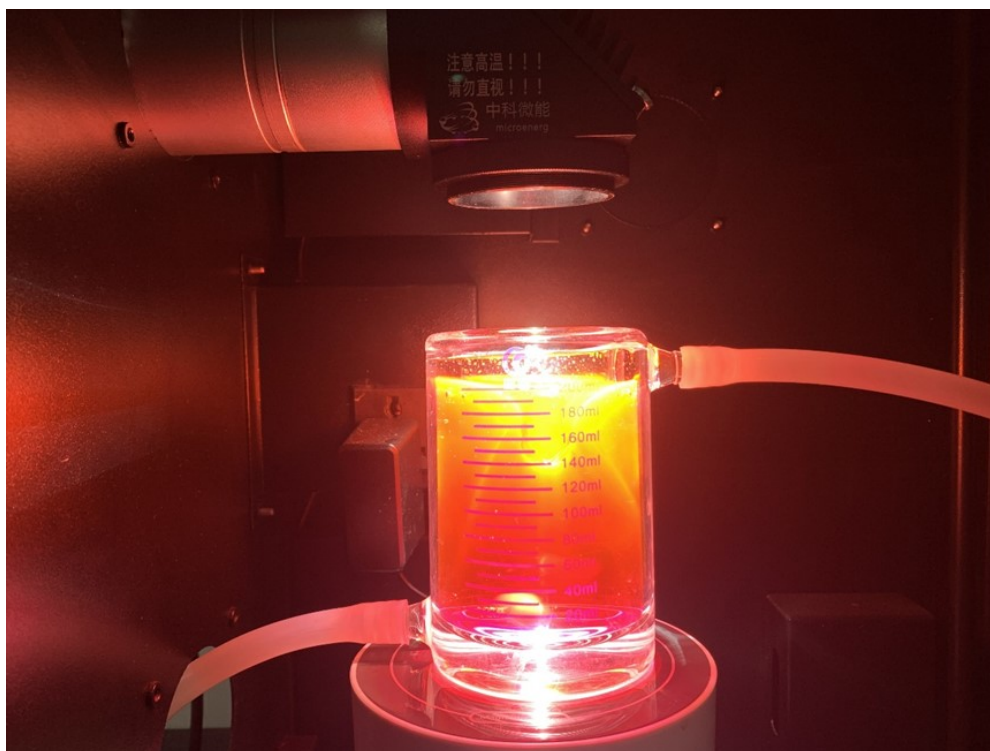

**Figure S1.** Photocatalytic experimental reactor

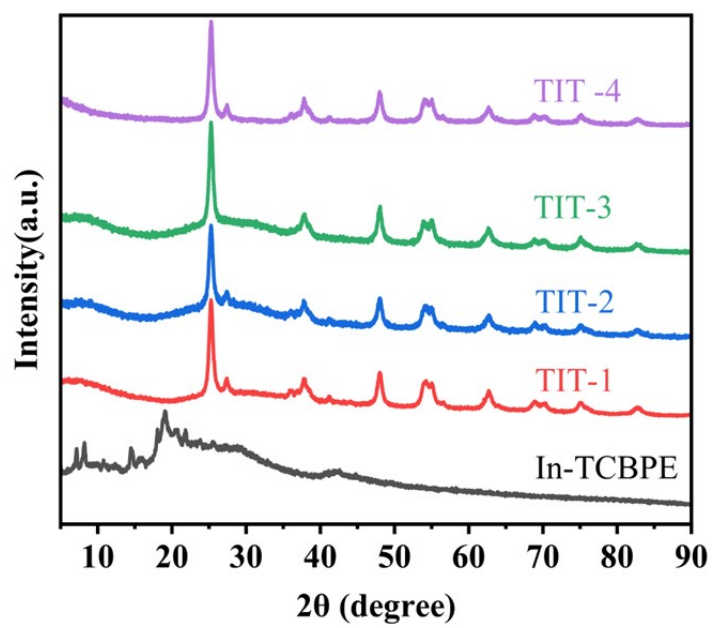

**Figure S2.** XRD patterns of In-TCBPE, TIT-1, TIT-2, TIT-3, and TIT-4.

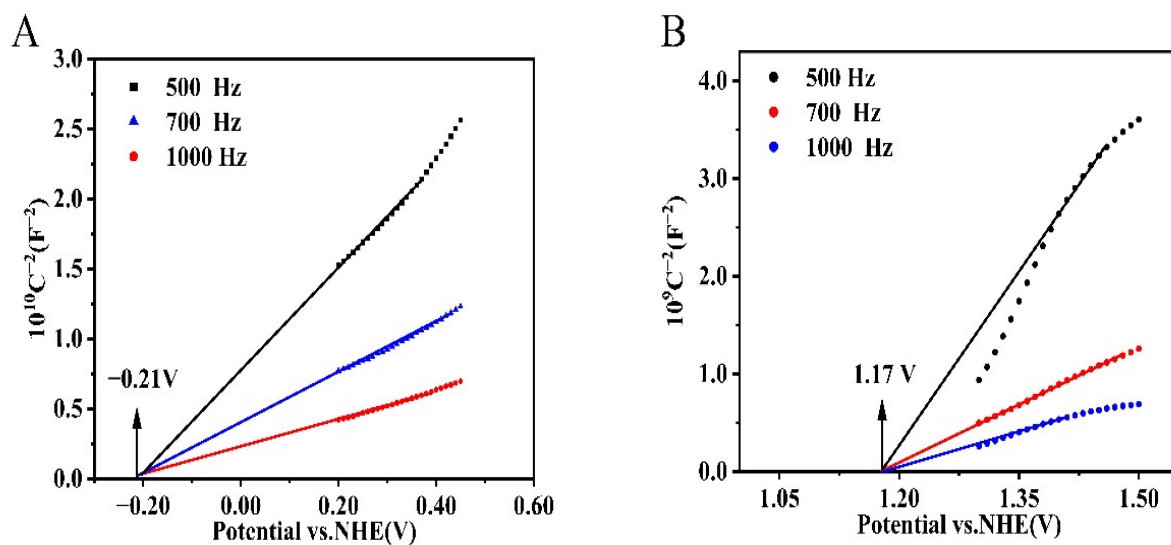

Fig. S3. Mott-Schottky plots of (A)  $\text{TiO}_2$  and (B) In-TCBPE.

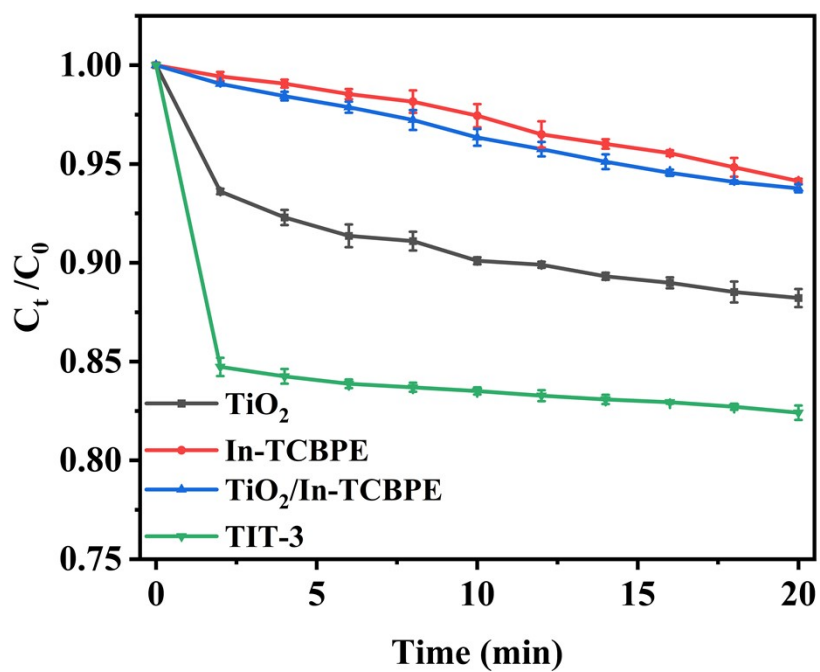

Figure S4. Adsorption experiment of RhB for the catalysts in the dark

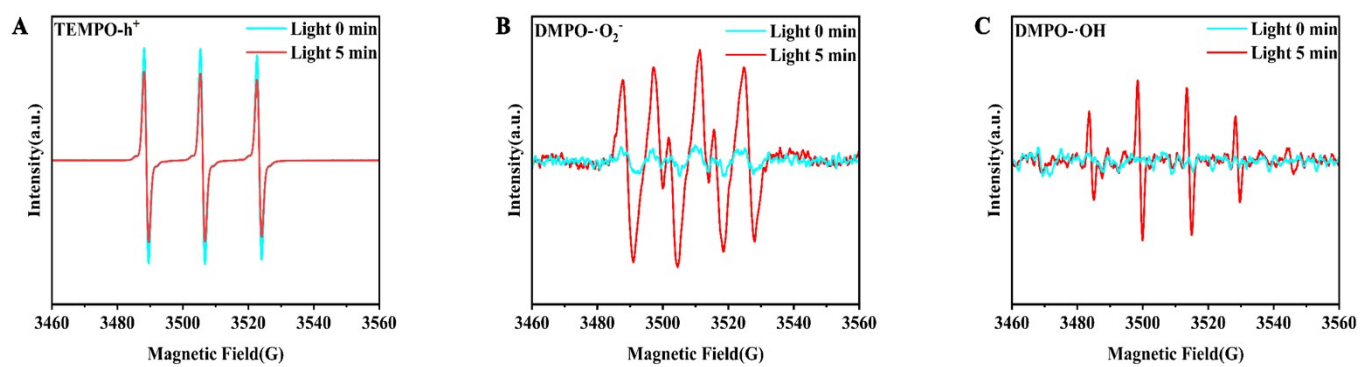

**Figure S5.** EPR spectra of TIT-3 for the signal of (A) TEMPO-h<sup>+</sup>, (B) DMPO-·OH and (C) DMPO-·O<sub>2</sub><sup>-</sup>.
